# 1 Tug-of-peace: Visual Rivalry and 2 Atypical Visual Motion Processing in 3 MECP2 duplication Syndrome of 4 Autism

5 Daria Bogatova<sup>1,2,3</sup>, Stelios M. Smirnakis<sup>1,3,4</sup>, Ganna Palagina<sup>1,3,4\*</sup>

\*For correspondence:

[gpalagina@bwh.harvard.edu](mailto:gpalagina@bwh.harvard.edu)

6 <sup>1</sup>Brigham and Women's Hospital, Boston, MA; <sup>2</sup>Boston University, Boston, MA;

7 <sup>3</sup>Harvard Medical School, Boston, MA; <sup>4</sup>Jamaica Plain VA Hospital, Jamaica Plain, MA

8

---

9 **Abstract** Extracting common patterns of neural circuit computations in the autism spectrum  
10 and confirming them as a cause of specific core traits of autism is the first step towards  
11 identifying cell- and circuit-level targets for effective clinical intervention. Studies in human  
12 subjects with autism have identified functional links and common anatomical substrates between  
13 core restricted behavioral repertoire, cognitive rigidity, and over-stability of visual percepts during  
14 visual rivalry. To be able to study these processes with single-cell precision and comprehensive  
15 neuronal population coverage, we developed the visual bi-stable perception paradigm for mice.  
16 Our task is based on plaid patterns consisting of two transparent gratings drifting at an angle of  
17 120° relative to each other. This results in spontaneous reversals of the perception between local  
18 component motion (motion of the plaid perceived as two separate moving grating components)  
19 and integrated global pattern motion (motion of the plaid perceived as a fused moving texture).  
20 Furthermore, this robust paradigm does not depend on the explicit report of the mouse, since  
21 the direction of the optokinetic nystagmus (OKN, rapid eye movements driven by either pattern  
22 or component motion) is used to infer the dominant percept. Using this paradigm, we found that  
23 the rate of perceptual reversals between global and local motion interpretations of the stimulus  
24 is reduced in the MECP2 duplication mouse model of autism.  
25 Moreover, the stability of local motion percepts is greatly increased in MECP2 duplication mice at  
26 the expense of global motion percepts. Thus, our model reproduces a subclass of the core  
27 features in human autism (reduced rate of visual rivalry and atypical perception of visual motion).  
28 This further offers a well-controlled approach for dissecting neuronal circuits underlying these  
29 core features.

## 30 **Introduction**

31 Autism is a group of neurodevelopmental disorders traditionally conceptualized as impairments  
32 of high-level cognitive functions leading to deficient social communication and repetitive restricted  
33 behavioral repertoire. A distinct perceptual style accompanies these high-level features of the con-  
34 dition and sensory picture of the world, focusing on the fine details of the environment rather than  
35 globally integrated scenes (*Robertson and Baron-Cohen, 2017; Van der Hallen et al., 2019*). Even  
36 before social deficits become evident, over 90% of individuals with autism experience altered sen-  
37 sation and atypical sensory perception that affect every sensory modality (*Grzadzinski et al., 2013;*  
38 *Robertson and Baron-Cohen, 2017; Simmons et al., 2009; Van der Hallen et al., 2019; Robertson*

40 *and Simmons, 2015*). A recent version of DSM (2013) now lists atypical sensory perception as a core  
41 diagnostic feature of autism, together with social communication deficits and restricted repetitive  
42 behaviors (*APA, 2013*). Another relevant feature of autism is the heterogeneity of expression of  
43 core traits and remarkable behavioral diversity across individuals, affecting all aspects of interac-  
44 tion with physical and social environments (*Baron-Cohen et al., 2009; Bolton et al., 2020; Lawson*  
45 *et al., 2015; Robertson and Baron-Cohen, 2017; Shafritz et al., 2008; Uddin, 2021; Van der Hallen*  
46 *et al., 2019*). Thus, to explain the autistic brain, one must consider what it is in the brain that pro-  
47 vides common ground for apparently disparate phenomena such as social communication, cog-  
48 nitive rigidity, and atypical visual perception. What can account for the phenotypical diversity of  
49 the condition and, at the same time, ensure the presence of its core features in most affected in-  
50 dividuals? Importantly, it becomes critical to develop behavioral paradigms and approaches that  
51 can reliably measure these putative common ground processes and be applied in mouse models  
52 of autism with the long-term goal of studying the circuit basis of the condition and providing a  
53 pipeline for fast drug candidate screening.

54 In this work we apply a bi-stable visual perception paradigm to study the mouse model of  
55 MECP2 duplication syndrome (*Collins et al., 2004; Ramocki et al., 2010*), a syndromic ASD caused  
56 by genomic duplication of methyl-CpG-binding protein 2 (*Ramocki et al., 2010*) that exhibits 100 %  
57 penetrance in males. In humans, MECP2 duplication syndrome displays all core features of idio-  
58 pathic autism (*Peters et al., 2013; Ta et al., 2022*). MECP2 duplication mice carry a number of core  
59 autism features including repetitive stereotyped behaviors, altered vocalizations, increased anxi-  
60 ety, motor savant phenotype and over-reliable visual responses (*Collins et al., 2004; Jiang et al.,*  
61 *2013; Samaco et al., 2012; Sztainberg et al., 2015; Zhang et al., 2017; Zhou et al., 2019; Ash et al.,*  
62 *2017, 2021b,a, 2022*).

63 Bistable visual perception paradigms are a natural choice for studying autistic brains. First,  
64 the dynamics of visual rivalry are altered in idiopathic human autism, with subjects showing a de-  
65 creased rate of perceptual reversals (*Robertson et al., 2013; Spiegel et al., 2019*). Second, visual  
66 rivalry is a distributed computation involving both low-level sensory cortical areas and high-level  
67 association areas, such as the secondary motor cortex and prefrontal cortex (*Kleinschmidt et al.,*  
68 *1998; Knapen et al., 2011; Leopold and Logothetis, 1996, 1999; Lumer et al., 1998; Lumer and Rees,*  
69 *1999*). Thus, its dynamics are based on stimulus representation sub-networks in the early visual  
70 cortex as well as visuomotor areas and high-level cognition-related non-sensory sub-networks of  
71 higher-order cortical areas. As a result, it can be a suitable candidate method to evaluate both  
72 (a) low-level sensory processing dysfunction that involves the primary sensory cortex, and (b) high-  
73 -level dysfunction such as cognitive rigidity and restricted social communication, which rely on dis-  
74 tributed computations in non-sensory association frontal and prefrontal cortical areas. Indeed, in  
75 human autism slower rate of bistable alternations was shown to share an anatomical substrate  
76 with general cognitive rigidity, and binocular rivalry phenotype predicts the severity of social phe-  
77 notype and the diagnosis of ASD (*Spiegel et al., 2019; Watanabe et al., 2019*). Importantly, it was  
78 suggested that the dynamics of the visual rivalry are dependent on brain-wide excitatory-inhibitory  
79 balance — a process that is also proposed to be altered in autism, leading to the expression of core  
80 traits of ASD (reviewed in (*Zhao et al., 2021*)). Finally, our visual rivalry paradigm utilizes a bistable  
81 moving plaid, in which the subject's perception switches between the local motion-based, "trans-  
82 parent" interpretation of the stimulus versus the global motion-based, "coherent" interpretation.  
83 Thus, our paradigm also offers the additional advantage of exploring another core trait of autistic  
84 brains: atypical processing of visual motion and detail-oriented sensory processing style (reviewed  
85 in (*Robertson and Baron-Cohen, 2017; Van der Hallen et al., 2019*)).

86 Using our paradigm, we found that MECP2 duplication mice recapitulate the phenotype in a  
87 subset of subjects with idiopathic autism. Specifically, compared to unaffected littermates, MECP2  
88 duplication mice display a reduced rate of perceptual reversals during visual rivalry and strongly  
89 prefer to focus on local moving cues rather than the integrated percept of coherent global motion.

## 90 Experimental Procedures

### 91 Animals

92 All experiments and animal procedures were performed in accordance with guidelines of the Na-  
93 tional Institutes of Health for the care and use of laboratory animals and were approved by the  
94 Brigham and Women's Hospital (BWH) Institution Animal Care and Use Committee (IACUC). We  
95 used mice of two different backgrounds: mixed background C57×FVB-MECP2 duplication mice  
96 and 129-MECP2 duplication mice (*Ash et al., 2022*). Mixed background mice were produced by  
97 crossing C57Bl6j mice to FVB-MECP2 duplication line (Tg1) (*Collins et al., 2004*) mice to generate F1  
98 C57×FVB-MECP2 duplication mice and non-transgenic littermate controls. Experiments were per-  
99 formed in 4–6-month-old animals. Cohorts were balanced in terms of animal sex (129 background:  
100 3 male and 3 female pairs; C57×FVB background: 4 male and 4 female pairs). The experimenters  
101 were blind to animal genotypes during experiments and analysis.

### 102 Surgery

103 All procedures were performed according to animal welfare guidelines authorized by the Brigham  
104 and Women's Hospital IACUC committee. Mice were anesthetized with 1.5 % isoflurane. The mouse  
105 head was fixed in a stereotactic stage (Kopf Instruments), and eyes were protected with a thin layer  
106 of artificial tears ointment (GenTeal). The scalp was shaved and disinfected by applying consecu-  
107 tive swabs of the povidone-iodine solution and 70 % ethanol, and then the scalp was resected. A  
108 custom-made titanium head plate was attached to the skull with dental acrylic (Lang Dental), pre-  
109 venting occlusion of the mouse's visual field.

### 110 Visual stimulation

111 Visual stimuli were generated in MATLAB and displayed using Psychtoolbox (*Brainard, 1997*). The  
112 stimuli were presented on two LCD monitors with a 60 Hz frame rate, positioned  $\approx 10$  cm in front  
113 of the right eye and covering  $180^\circ$  of the right visual field of the mouse. The screens were gamma-  
114 corrected, and the mean luminance level was photopic at  $80 \frac{\text{cd}}{\text{m}^2}$ . Visual stimuli consisted of drift-  
115 ing square-wave gratings and plaids of  $120^\circ$  cross angle composed of the grating stimuli compo-  
116 nents. The gratings had the following parameters: temporal frequency 1.7 Hz, spatial frequency  
117 0.06 cycles/ $^\circ$ , spatial duty cycle 0.8 (white bar set to 60 %, black bar set to 40 %). These parame-  
118 ters were selected to accommodate average spatial frequency and velocity preferences in visually-  
119 responsive neurons across mouse visual cortical hierarchy (*de Vries et al., 2019; Gao et al., 2010;*  
120 *Niell and Stryker, 2008; Ohki et al., 2005*). Additive plaid patterns were constructed by summing up  
121 component gratings of  $50^\circ$  contrast (*Smith et al., 2005*). Each instance of plaid or grating movie was  
122 preceded by a gray isoluminant screen for 5 min. We kept mean luminance constant throughout  
123 both the background and the stimulation periods.

### 124 Optokinetic nystagmus

125 We recorded optokinetic eye movements (EM) elicited during observation of drifting gratings and  
126 plaids in 13 head-posted mice MECP2 duplication — littermate pairs. Seven pairs were C57×FVB  
127 mixed background mice and six pairs were 129 background mice. The stimulus was presented  
128 on two screens covering  $\approx 180^\circ$  of the visual field of the mouse. The center of each screen was  
129 located at 10 cm from the mouse (Figure 2). We used an infrared camera (model MAKO U-29,  
130 Allied Vision Technologies) and a hot mirror to record the movements of the right eye at 300 Hz.  
131 We analyzed 5 to 15-min-long movies off-line with Deep Lab Cut toolbox (*Mathis et al., 2018*) to  
132 detect the pupil and extract its diameter and position. Optokinetic eye movement is composed  
133 of smooth pursuit following the motion of salient features in the stimulus, followed by a rapid  
134 saccade in the direction opposite to the direction of the global stimulus drift to stabilize the image  
135 on the retina (*Cahill and Nathans, 2008*). This pattern of movements (slow pursuit phase plus  
136 rapid saccade phase) repeats as long as the stimulus (drifting grating or plaid) is present and is

137 attended by the animal. We analyzed both vertical and horizontal EM components to classify plaid-  
138 induced OKN as aligned with local motion percept vs. aligned with global motion percept. Periods  
139 containing eye-blink artifacts and mouse grooming, that the Deep Lab Cut algorithm identified as  
140 having a probability of being a pupil below 95 %, were removed from the analysis. We applied  
141 a linear fit to the slow pursuit phase of each EM and calculated the eye movement amplitude  
142 from each fit (Figure 1C). The direction of each EM was determined by comparing the amplitude  
143 of horizontal and vertical saccade projections of EM components. We then plotted histograms  
144 of the directions of EMs around 0°, which corresponds to the horizontal direction (the direction  
145 of the drift of the global stimulus; see Figure 1). For the plaid-induced OKN, we classified each  
146 EM as component- or pattern-aligned. For this, we first determined the horizontal direction and  
147 the average width of the distribution of EM angles evoked by horizontally drifting gratings. We  
148 used one standard deviation (SD) from the mean as the threshold for pattern-aligned EM angles.  
149 Thus, any EM whose angle exceeded this threshold was classified as component-aligned, while  
150 EMs with angles inside the  $[-SD, +SD]$  interval are classified as pattern motion-aligned (Figures 1E  
151 and 1G). To study the dynamics of OKN alternations between following the global pattern motion or  
152 following component motion, we analyzed 2–6 15 min movies of OKN induced by the plaid stimulus  
153 moving in the temporonasal (T → N) direction. We extracted the periods of the stable OKN (at least  
154 two saccade-pursuit pairs, occurring without a break between the pairs; e.g., saccadic movement  
155 is followed by the pursuit phase of the next pair). To identify periods without the OKN (breaks),  
156 we first examined the distribution of lengths of pursuits of individual nystagmoid eye movements.  
157 Periods of eye drift without return saccades exceeding the 95<sup>th</sup> percentile of this distribution of  
158 lengths were considered breaks in the OKN. During breaks mouse either was not attending to the  
159 stimulus and thus experienced no OKN, closed eyes, or experienced eye blinks and grooming bouts.  
160 Periods of OKN between breaks (OKN epochs) had to contain at least two consecutive saccade-  
161 pursuit pairs to be accepted for the analysis of perceptual reversals. Each movie had to contain at  
162 least 3 min of OKN to be accepted for the analysis.

163 We determined the following parameters:

- 164 1. Perceptual reversal rate in each OKN epoch. The rates were averaged over epochs and  
165 movies to obtain a median value per animal.
- 166 2. The probability of experiencing a switch within 1 min of the beginning of bistable OKN.
- 167 3. The durations of “coherent” and “transparent” OKN periods in each animal. Durations were  
168 averaged over movies and animals to obtain one median value per animal.
- 169 4. Fraction of eye movements aligned with pattern and component motion across all movies of  
170 a specific animal.
- 171 5. Fraction of OKN epochs with no observed perceptual reversals (non-reversal OKN epochs).

## 172 **Statistical tests**

173 Comparing the per-animal reversal rates, dominance period durations, and component/pattern  
174 motion ratio we used paired Wilcoxon signed rank (WSR) test comparing the 2-duplication mouse  
175 to his littermate. Statistics were computed across animals. The distributions of switch rates per  
176 OKN epoch and durations of dominance periods were fitted with the gamma distribution function.  
177 To accept or reject the fit for the gamma distribution fitting of dominance duration periods and  
178 switch rates, we used the  $\chi^2$  test.

## 179 **Results**

### 180 **Report-free bi-stable perception paradigm**

181 A reliable way to infer the perceptual state when a bistable visual motion-based stimulus is pre-  
182 sented is to measure the direction of the optokinetic nystagmus elicited by the different directions  
183 of drift generated by the rivaling stimuli (*Enoksson, 1963; Fox et al., 1975; Leopold et al., 1995;*

184 *Naber et al., 2011; Watanabe, 1999; Wei and Sun, 1998; Logothetis and Schall, 1989*). Unambigu-  
185 ous fully coherent full-field moving visual stimuli, such as dot fields, coherently moving natural  
186 scenes and high-contrast drifting gratings, induce optokinetic nystagmus (OKN) reflex in vertebrate  
187 animals such as mammals, birds and fish (*Cahill and Nathans, 2008*). The OKN is required for the  
188 stabilization of retinal input under the conditions of a drifting visual environment. OKN eye move-  
189 ments consist of a slow pursuit in the direction of the stimulus followed by a fast saccade returning  
190 the eye to its initial position. OKN has been extensively validated as a reliable indicator of the dom-  
191 inant percept in experimental designs involving ambiguous stimuli, such as binocular rivalry (*Fox*  
192 *et al., 1975; Naber et al., 2011; Watanabe, 1999; Wei and Sun, 1998; Logothetis and Schall, 1989*).  
193 Under ambiguous visual conditions, the direction of pursuit during slow phases of OKN is aligned  
194 with the direction of motion of the dominant percept (*Palagina et al., 2017*).

195 We have previously shown that mice can exhibit visual bistable perception when exposed to  
196 a moving transparent additive plaid stimulus covering  $\approx 270^\circ$  of the visual field (*Palagina et al.,*  
197 *2017*). The symmetric transparent additive plaid we used is composed of two transparent gratings  
198 of equal contrast and velocity moving at an angle to each other. Under the range of bi-stability  
199 promoting stimulus properties, the subjective perception of this stimulus alternates between the  
200 “transparent” interpretation, where two full-field component gratings slide on top of each other,  
201 and the “coherent” interpretation, where a fused pattern drifting in a direction half-way between  
202 the directions of component gratings is seen (*Adelson and Movshon, 1982; Moreno-Bote et al.,*  
203 *2010*). Large cross-angle between the grating components of the plaid, “transparency-promoting”  
204 intersection luminance values of the dark bars (equal to the sum of the luminances of the com-  
205 ponents), high component grating velocity, asymmetric intersections (occurring when the cross  
206 angle between component gratings is above or below  $90^\circ$ ) promote a transparent interpretation  
207 (*Moreno-Bote et al., 2010; Movshon et al., 1985*). Symmetry in component gratings’ contrast, spa-  
208 tial frequency and velocity favor the coherent percept (*Adelson and Movshon, 1982; Yo and De-*  
209 *mer, 1992*). In the previous work, using stimuli fulfilling these criteria ( $60^\circ$  or  $120^\circ$  cross-angle be-  
210 tween components, contrast normalization, drift velocity 2 cycle/ $^\circ$  of visual field, spatial frequency  
211 0.05 cycle/ $^\circ$  and symmetry in the properties of component gratings) we were able to elicit bistable  
212 OKN in C57 wild-type mice. These properties were tailored to be optimal for mouse area V1 (*Gao*  
213 *et al., 2010; Niell and Stryker, 2008; Ohki et al., 2005*). In the present study we modified the stimu-  
214 lus keeping in mind the necessity to drive as a large proportion of neurons as possible in different  
215 visual areas, which have varying preferences for the drift velocity and spatial frequency of the stim-  
216 uli. To do this, we changed the duty cycle of the stimuli to 0.8 cycle/ $^\circ$  and drift velocity to 1.7 cycle/ $^\circ$ ,  
217 while keeping the components symmetric (spatial frequency 0.06 cycle/ $^\circ$ ) and contrast normalized  
218 to achieve transparency-promoting luminance of the intersections. We used  $120^\circ$  CA (cross-angle)  
219 plaids as this was shown to induce an equidominant state (where the observer spends nearly equal  
220 time on transparent and coherent percepts) in both human observers (*Moreno-Bote et al., 2010*)  
221 and mice (*Palagina et al., 2017*). We also reduced the coverage of the visual field to  $180^\circ$  of the  
222 right eye’s visual field, as this was shown to induce reliable OKN in mice (*Cahill and Nathans, 2008*)  
223 while allowing us to combine the behavioral task with 2-photon imaging or electrophysiological  
224 recordings in future experimental work.



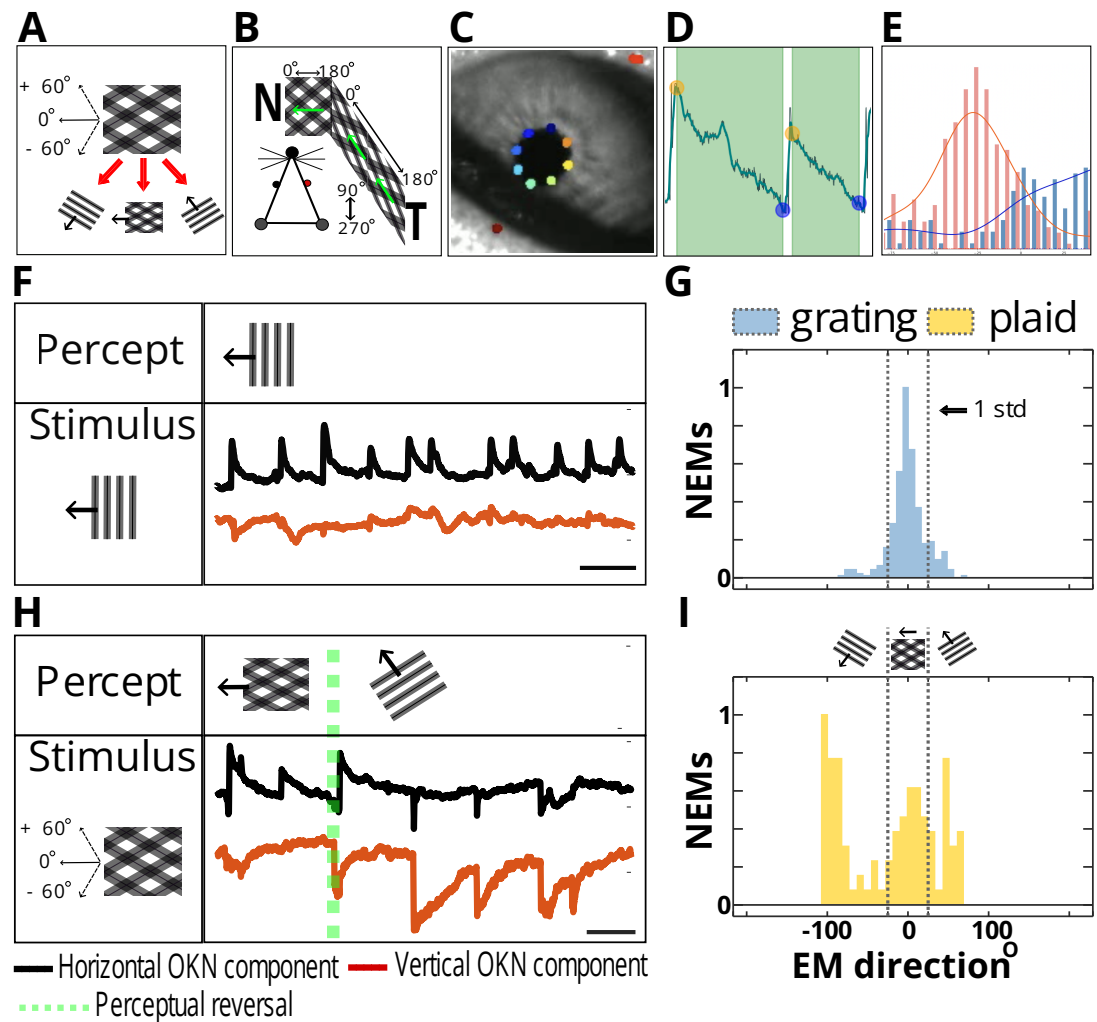

Figure 1: **Bistable OKN responses under visual rivalry.** **A. Bistable moving plaid stimulus.**

Type I symmetric plaid is composed by summing two 50% contrast component gratings. The gratings move at an angle of 120 degrees relative to each other. This plaid can be seen either as two individual gratings moving at an angle or as a sum of gratings integrated percept of pattern motion. The direction of pattern motion lies in between the directions of motion of each grating. Thus, the observer can follow three directions of motion (lower panel): pattern motion (direction set at  $0^\circ$ ), and either of the component grating's drift, offset at  $+60^\circ$  and  $-60^\circ$  from the vector of the plaid's motion (insets). **B. Experimental setup.** We presented the stimuli on two screens positioned at equal distances from the mouse head to cover  $180^\circ$  of the mouse ipsilateral visual field. We head-posted the mouse to prevent head movements and monitored eye movements with an infrared camera. The mouse could walk freely on the free-moving wheel. Green arrows indicate the direction of the global drift of the stimulus. The stimulus was moving toward the mouse's nose to induce robust optokinetic movements. **C, D, E. Data preprocessing pipeline.** **C:** An infrared image of the mouse eye. OKN images were collected at 300 Hz and 20 randomly selected mouse pupil movies were used to train Deep Lab Cut ResNET-150 model to extract the position and size of the animal's pupil during the OKN. (Colored dots DeepLabCut feature detection). **D:** The vertical and horizontal components of the OKN were sorted into saccade-pursuit eye movement pairs, and eye-blink and grooming-related artifacts were located using custom-written Python toolbox "Dolia" and excluded from analysis (Bogatova et al., 2023), manuscript in preparation. **E:** The pursuit phases of the OKN eye movements were fitted with a linear polynomial fit. The example of the ratio between fitted vertical and horizontal component of each eye movement was then used to determine its direction (angle). Pink and blue histogram show the example distributions of eye movement directions from two different 15 minute OKN movies.

Figure 1: Using the ratio of the vertical and horizontal components' amplitudes, the directions of the eye movements were determined (see Methods section for details). Right: distributions of the directions of pursuit phases of OKN for two different OKN movies. **F, G. Grating-induced OKN.** To determine the location of zero direction (pattern motion direction) and classify eye movements as aligned with pattern motion or alternatively the motion of the components, we used OKN data obtained by presenting the 0 direction grating moving in temporonasal direction, similarly to the plaid setup. Since such a grating has only one unambiguous direction of drift, it is possible to use the mean of the eye movement direction distribution as a zero direction. Additionally, [-standard deviation, +standard deviation] can be set as a bracket in which most eye movements aligned with zero direction fall Figure 1E. The grating-induced OKN is shown in **F**: as expected, OKN eye movements contain a sole horizontal component (black trace), with no consistent vertical deflections (red trace), and this stimulus does not result in visual rivalry as only one interpretation of the stimulus is possible. In **G**, the distribution of grating-induced OKN is shown (yellow histogram, 13 zero-direction grating movies from 13 animals were used to determine zero position, and the standard deviation bracket for eye movement classification). [-standard deviation, +standard deviation] interval around the zero direction is then applied to plaid OKN data: the eye movements with directions inside this interval are classified as pattern-motion aligned, while eye movements with directions outside of this interval are classified as component-motion aligned Figure 1G, blue histogram. **H, I. Plaid-induced OKN shows bi-stable reversals of the eye movement directions.** In **H**, the mouse can follow either the plaid or the grating direction while observing the unchanging plaid stimulus. Green dotted line — location of the perceptual switch, defined as the start of the saccade where the animal starts following a different stimulus interpretation. Initially, the animal follows a pattern motion direction, as evident from OKN parameters — the presence of a robust horizontal component and no consistent vertical component (before the green dotted line). After the reversal, a solid vertical component appears (red trace) as the animal stops following the pattern motion and starts following the +60° degrees component. **I**, blue histogram: the EM directions distribution of OKN induced by a plaid stimulus. Gray dotted lines correspond to the pattern-component OKN classification bracket derived from grating OKN data (see the blue histogram in **G**). In contrast to grating data, plaid OKN, in addition to the central peak corresponding to pattern-motion aligned eye movements, has two additional peaks located at approximately +60° and -60° off the central peak and corresponding to component motion-aligned OKN.

225 Under the updated conditions we show that both 129-background and C57×FVB mixed back-  
226 ground mice show bi-stable optokinetic nystagmus, aligned either with the direction of component  
227 gratings or the direction of coherent pattern motion (Figure 1), similarly to what we observed in  
228 C57 mice previously (*Palagina et al., 2017*). We observed no difference in the rate of generation of  
229 OKN between littermates and MECP2 duplication mice or in the magnitude of eye movements (eye  
230 movement amplitude, arbitrary units: littermates,  $7.43 \pm 0.5$ , MECP2-ds,  $6.33 \pm 0.51$ ;  $p = 0.308$ , WSR;  
231 OKN rate (in  $\frac{\text{eye movement}}{\text{min}}$ ): littermates,  $9.7 \pm 1.7$ , MECP2-ds,  $7 \pm 0.75$ ,  $p = 0.216$ , WSR). There was no  
232 difference between 129 background animals and C57×FVB background animals in terms of OKN  
233 properties and dynamics of visual rivalry, thus these two groups were pooled together. The exper-  
234 imental setup is shown in Figure 1. Stimuli were presented on two contiguous screens covering  
235 180° of the mouse contralateral visual field, and pupil position was recorded with the help of hot  
236 mirror and an infrared camera. Figure 1F shows an example of OKN elicited by a vertically oriented  
237 grating moving from the temporal to nasal direction. In this case the eye movements elicited by the  
238 stimulus are aligned with the horizontal direction (0°, taken along the temporal→nasal direction).  
239 In contrast to the unambiguous horizontally drifting gratings, OKN eye movements elicited by a  
240 120° CA plaid show a tri-modal distribution of eye movement directions: a considerable fraction  
241 of eye movements is aligned with one of the two component grating directions in addition to the  
242 horizontally aligned OKN that corresponds to the fused pattern motion percept (Figure 1H). This

243 strongly suggests that the perception of the mouse alternates between pattern and component  
244 motion for our stimuli in the recorded cohort of mice.

### 245 **MECP2 duplication mice show reduced rate and probability of perceptual reversals**

246 We next examined the dynamics of bi-stable reversals between “coherent” interpretation OKN  
247 (mouse tracking global pattern; OKN eye movements aligned with the global pattern direction) and  
248 “transparent” interpretation OKN (mouse tracking the component gratings; OKN eye movements  
249 aligned with the direction of drift of either component grating) in MECP2 duplication animals ver-  
250 sus unaffected littermates. Both MECP2 duplication animals and littermates displayed bi-stable  
251 reversals. However, in MECP2 duplication syndrome mice the rate of reversals was reduced com-  
252 pared to their normal littermate pairs (Figures 2A to 2C), and MECP2 duplication animals displayed  
253 more frequent OKN epochs where only a single interpretation of the stimulus was consistently fol-  
254 lowed and no perceptual reversals occurred (Figure 2D; non-reversal OKN fraction: littermates,  
255 mean  $\pm$  sem:  $0.33 \pm 0.055$ , median: 0.374; MECP2-ds, mean  $\pm$  sem:  $0.555 \pm 0.04$ , median: 0.54;  
256  $p = 0.0027$ , WRS). Consequently, the fraction of OKN epochs showing bi-stable reversals was re-  
257 duced in MECP2 duplication animals. Littermates showed on average 2.8 reversals per one minute  
258 of OKN movie (mean  $\pm$  sem:  $2.8 \pm 0.58$ , median: 2.05), while MECP2-ds mice showed 1.9 reversals  
259 per minute (mean  $\pm$  sem:  $1.895 \pm 0.325$ , median: 1.485), a significant reduction in bi-stable reversal  
260 rate ( $p = 0.0134$ , WSR,  $n = 13$  pairs) (Figures 2A and 2B). The probability to observe a switch after 1  
261 minute of uninterrupted plaid-driven OKN was consequently reduced in MECP2 duplication mice  
262 (littermates, mean $\pm$ sem:  $0.4425 \pm 0.054$ , median: 0.407; MECP2 duplication mean $\pm$ sem:  $0.284 \pm 0.028$ ,  
263 median: 0.308;  $p = 0.0142$ , WSR) (Figure 2C). In sum, the properties of bi-stable reversal dynamics  
264 are altered in MECP2 duplication mice, with duplication animals showing increased proportion of  
265 reversal-free OKN epochs and reduced reversal rate and probability.

### 266 **Local versus global motion processing in MECP2 duplication mice and increased stability of local motion “transparent” percepts**

268 The slower rate of rivalry in MECP2 duplication mice was accompanied by pronounced changes  
269 in the processing of visual motion. Specifically, MECP2 duplication animals showed strong prefer-  
270 ence for the component motion compared to their normal littermates (Figure 3). The latter either  
271 spent approximately equal time following component gratings vs. coherent pattern direction, or  
272 showed preference for coherent pattern direction. This effect was seen both in the total fraction of  
273 OKN eye movements aligned with the component versus the pattern directions (Figure 3), and in  
274 the duration of component-versus pattern-dominance periods (Figures 3B and 3C). Interestingly,  
275 for dominance periods, the strongest effect was observed in the duration of component percepts,  
276 which were on average twice as long in MECP2 duplication animals as in littermate controls (Fig-  
277 ure 3C, littermates, mean $\pm$ sem:  $27.5 \pm 7.11$ , median: 20.2; MECP2-ds, mean $\pm$ sem:  $49.2 \pm 11.5$ , median:  
278 31). This effect was highly reproducible across pairs and highly significant (Figure 3C,  $p = 0.0081$ ,  
279 WSR). In contrast to the component-aligned OKN periods, the durations of pattern motion-aligned  
280 OKN periods showed disparate effects: in some duplication-littermate pairs MECP2 duplication led  
281 to an increase in pattern percept durations, while in other a decrease was observed (Figure 3D).  
282 Pooled data, including both durations of component and pattern motion-aligned OKN showed a  
283 net increase in dominance period durations, consistent with a reduced rate of perceptual reversals  
284 (Figure 3B, littermates, mean  $\pm$  sem:  $25.2 \pm 4.5$ , median: 21; MECP2-ds, mean  $\pm$  sem:  $36.7 \pm 8$ , median:  
285 25;  $p = 0.0342$ , WSR). In addition, MECP2 duplication animals showed a consistent shift of the ra-  
286 tio between component motion percept duration and pattern motion percept duration in favor of  
287 component motion percepts (Figure 3E). These findings imply that the bulk of the effect that MECP2  
288 duplication has on the perceptual reversals occurs due to increased stability of the component mo-  
289 tion “transparent” percepts and a resulting shift of the ratio between component-pattern motion  
290 percept duration in favor of the component (“transparent”) interpretation. Ultra-stable component  
291 motion percepts then may contribute to lower probability to observe a reversal.



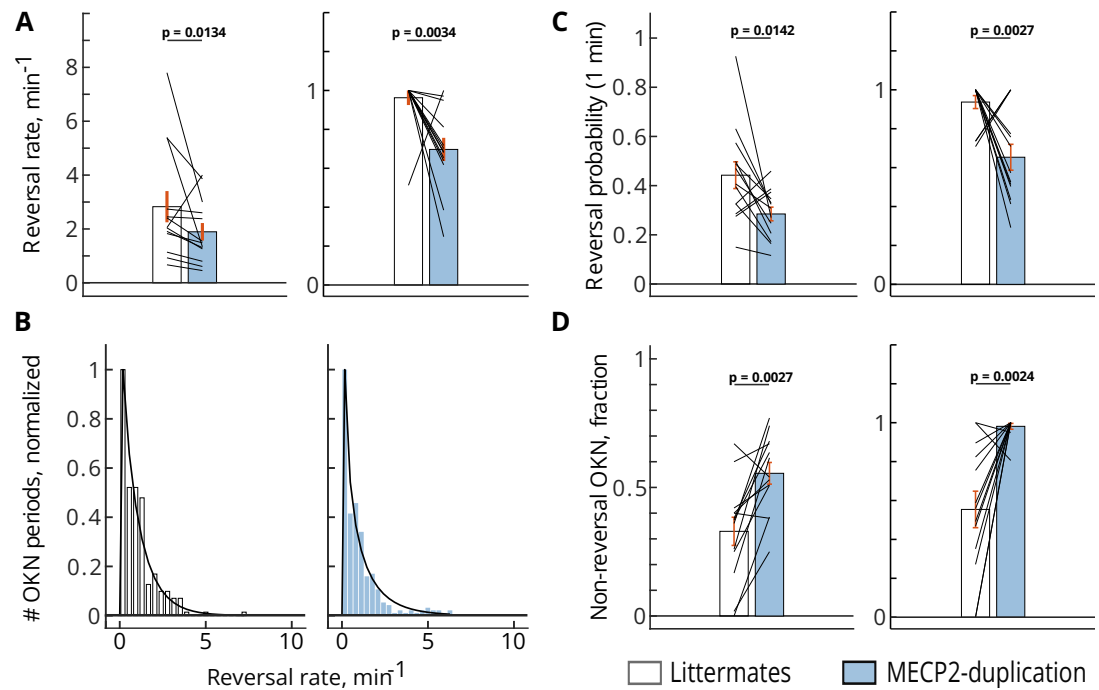

Figure 2: **MECP2 duplication syndrome results in reduced perceptual reversal rate during visual rivalry.** white bars — littermates; blue bars — MECP2 duplication syndrome. **A. The reversal rate (per minute of OKN) is consistently lower in MECP2-ds than in normal littermates.** Left panel — raw data, right panel — data normalized by maximum inside each littermate — MECP2 duplication pair. Reversals per minute: littermates, mean  $\pm$  sem:  $2.8 \pm 0.58$ , median: 2.05; MECP2-ds, mean  $\pm$  sem:  $1.895 \pm 0.325$ , median: 1.485. **B. The distribution of perceptual reversal rates of individual OKN periods.** Left panel (white bars) — littermates; right panel (blue bars) — MECP2 duplication. The distributions follow gamma distribution fit (littermates:  $p < 0.0001$ ; MECP2-ds:  $p < 0.0001$ ,  $\chi^2$  test). Data were pooled across OKN periods belonging to 13 littermates and 13 MECP2 duplication animals, respectively. Before pooling, each animal's dataset was normalized by its mean rate. **C. In accordance with the reduced reversal rate in MECP2 duplication, the probability of observing a switch after 1 minute of ongoing plaid-induced OKN was also reduced in MECP2 duplication mice.** The left panel indicates raw data, while the right panel shows the data normalized by maximum inside each littermate — MECP2 duplication pair. Reversal probability: littermates, mean  $\pm$  sem:  $0.4425 \pm 0.054$ , median: 0.407; MECP2-ds, mean  $\pm$  sem:  $0.284 \pm 0.028$ , median: 0.308. **D. MECP2 duplication mice consistently show a substantial fraction of OKN periods where no reversals occur, and the animal persistently tracks either pattern (“coherent” percept) or component direction (“transparent” percept).** Left panel — raw data, right panel — data normalized by maximum inside each littermate — MECP2 duplication pair. Non-reversal OKN fraction: littermates, mean  $\pm$  sem:  $0.33 \pm 0.055$ , median: 0.374; MECP2-ds, mean  $\pm$  sem:  $0.555 \pm 0.04$ , median: 0.54. All  $p$ -values are determined by two-sided Wilcoxon signed rank test (WSR),  $n = 13$  pairs.

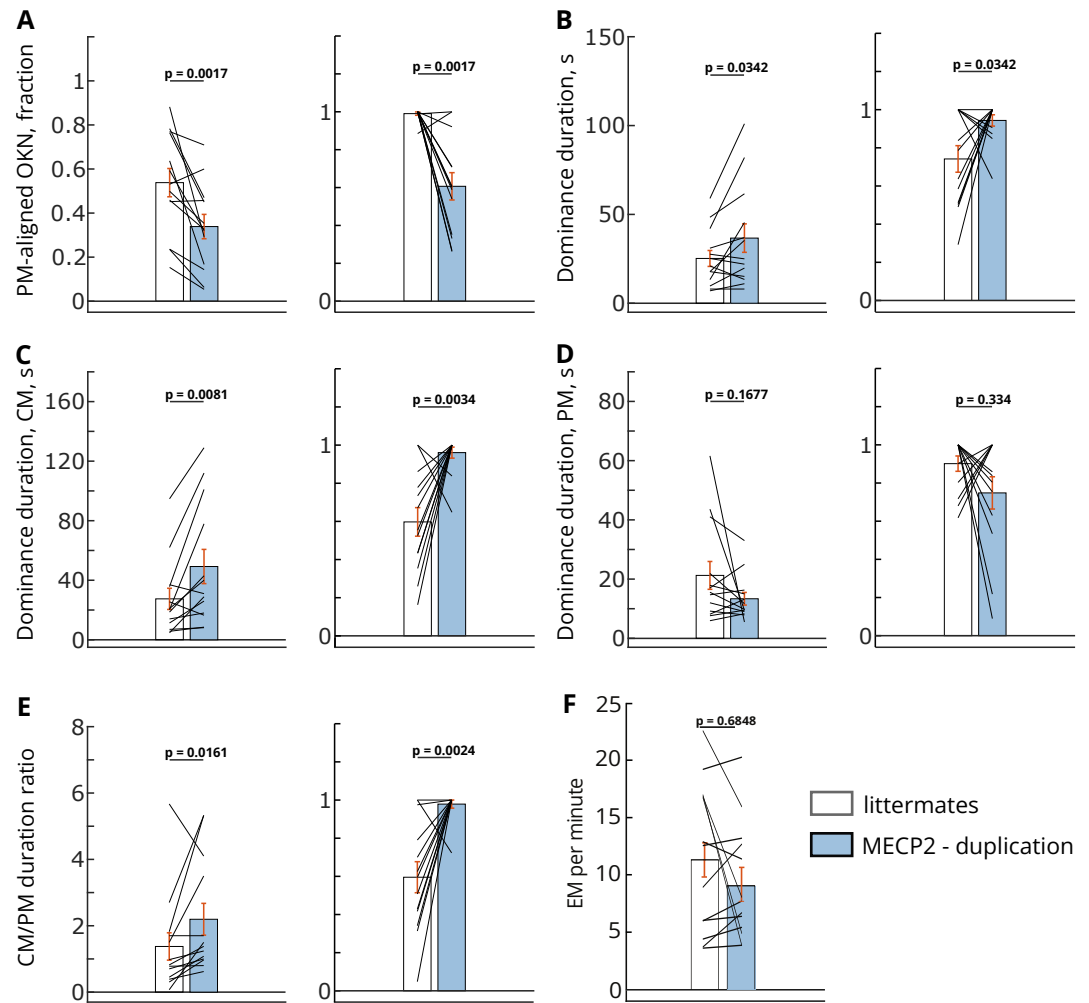

Figure 3: **Atypical preference for local motion processing in MECP2 duplication syndrome.** The reduced rate of perceptual reversals in MECP2 duplication mice is driven by the lengthening and over-stability of component motion (“transparent”) percepts. **A. The total fraction of nystagmoid eye movements aligned with pattern motion direction (“coherent” percept).** Even though there is considerable variance across data, in normal littermates (clear bar), nearly equal fractions of eye movements are aligned to either pattern motion direction (“coherent” percept, global motion) or component motion direction (“transparent” percept, local motion). In contrast, in MECP2 duplication mice, a greater portion of OKN eye movements is allocated to component local motion, and the fraction of pattern motion-aligned eye movements is reduced. Littermates, mean  $\pm$  sem:  $0.538 \pm 0.064$ , median: 0.53; MECP2-ds, mean  $\pm$  sem:  $0.339 \pm 0.055$ , median: 0.326. Left panel — raw data, right panel — data normalized by maximum inside each littermate — MECP2 duplication pair. **B. Dominance duration is increased in MECP2 duplication mice, following the decrease in reversal rate and reversal probability (Figure 2).** Littermates, mean  $\pm$  sem:  $25.2 \pm 4.5$ , median: 21; MECP2-ds, mean  $\pm$  sem:  $36.7 \pm 8$ , median: 25. Left panel — raw data, right panel — data normalized by maximum inside each littermate — MECP2 duplication pair; *p*-values, WSR. **C, D. The increase in average dominance duration is carried mainly by the increased durations of “transparent” percepts when the mouse is following the local motion of component gratings.** (C, littermates, mean  $\pm$  sem:  $27.5 \pm 7.11$ , median: 20.2; MECP2-ds, mean  $\pm$  sem:  $49.2 \pm 11.5$ , median: 31), while the global motion “coherent” percepts show inconsistent changes with shortening in some animals and lengthening in others (D, littermates, mean  $\pm$  sem:  $21.2 \pm 4.7$ ; MECP2-ds, mean  $\pm$  sem:  $13.36 \pm 2.2$ ). As a result, even though there is a general trend of shorter pattern-motion percepts in MECP2 duplication mice, it is not significant (*p* = 0.1677).

Figure 3: Left panels — raw data, right panels — data normalized by maximum inside each littermate — MECP2 duplication pair. **E. The ratio of dominance period durations is shifted in favor of transparent local motion percepts at the expense of global motion “coherent” percepts.** Littermates, mean  $\pm$  sem:  $1.376 \pm 0.41$ , median: 0.82; MECP2-ds, mean  $\pm$  sem:  $2.2 \pm 0.48$ , median: 1.38. Left panel — raw data, right panel — data normalized by maximum inside each littermate — MECP2 duplication pair. **F. The number of eye movements per minute in WT and MECP2-duplication mice.** Littermates, mean  $\pm$  sem:  $11.38 \pm 1.81$ , median: 12.37; MECP2-ds, mean  $\pm$  sem:  $9.07 \pm 1.41$ , median: 7.54. These results indicate that the difference in frequency of eye movement is not significant ( $p = 0.6848$ ). Left panel — raw data, right panel — data normalized by maximum inside each littermate — MECP2 duplication pair. White bars — littermates, blue bars — MECP2 duplication. All  $p$ -values are determined by two-sided Wilcoxon signed rank test (WSR), unless noted otherwise,  $n = 13$  pairs.

## 292 Discussion

### 293 Slower dynamics of visual rivalry in MECP2 duplication syndrome

294 We view the world as generally stable even in the face of fast dynamic changes, such as fast-  
295 moving objects and emerging stimuli. This stability rests on an uncertain foundation: naturalistic  
296 scenes are inherently ambiguous, and the stable percepts of them are a result of a probabilistic  
297 process reflecting the most likely interpretation of the inputs. As a result, neuronal populations  
298 are constantly engaged in such ongoing interpretation and adjust their decision variables accord-  
299 ingly (*Aggelopoulos, 2015; Leopold and Logothetis, 1999; Sterzer et al., 2009*). In bi-stable and  
300 multi-stable perception, the competing interpretations of the sensory input cannot ultimately win  
301 against each other; as a result, the brain vacillates between the conflicting interpretations even  
302 though the stimulus stays the same. Visual rivalry involves a network of areas spanning V1, visual  
303 association areas, frontal lobe, supplementary motor cortex, and prefrontal cortex (*Kleinschmidt*  
304 *et al., 1998; Knapen et al., 2011; Leopold and Logothetis, 1996; Lumer et al., 1998; Lumer and*  
305 *Rees, 1999*). As a result, top-down cortical processes stemming from sensory-motor integration,  
306 attention and decision making affect the dynamics of visual rivalry. Perception, decision-making,  
307 and cognate sensory processing are pervasively impacted in neurological circuitopathies such as  
308 schizophrenia and autism (*Robertson et al., 2013; Heeger et al., 2017; Schmack et al., 2015*). Specif-  
309 ically, in idiopathic human autism, atypical sensory perception co-exists with higher-order deficits  
310 in social communication, cognitive flexibility, and executive function (*APA, 2013; Robertson and*  
311 *Baron-Cohen, 2017; Simmons et al., 2009; Van der Hallen et al., 2019*). As a distributed compu-  
312 tation involving both the low-level sensation and perception processes and high-level processes  
313 pertaining on attention and decision-making, visual rivalry emerges as an attractive paradigm to  
314 study these processes and their interaction in the autism spectrum. In our study, we applied a  
315 monocular rivalry paradigm to explore if the dynamics of bistable visual perception were affected  
316 in the mouse model of MECP2 duplication syndrome of autism (*Collins et al., 2004*). This model  
317 reproduces some features of human autistic syndromes, including enhanced motor learning, motor,  
318 and visual stereotypies, and increased likelihood of seizure events (*Collins et al., 2004; Jiang*  
319 *et al., 2013; Samaco et al., 2012; Sztainberg et al., 2015; Zhang et al., 2017; Zhou et al., 2019; Ash*  
320 *et al., 2017, 2021b,a, 2022*). We found that the rate of perceptual reversals is decreased (Figure 2) in  
321 MECP2 duplication syndrome, while the average duration of individual percept dominance periods  
322 is prolonged (Figure 2). These effects occurred irrespective of the genetic line background of the  
323 mice, as we used both 129-MECP2 duplication line and FVB\*C57 mixed background duplication line  
324 (*Ash et al., 2022*). Reduced rate of perceptual reversals under visual rivalry conditions in MECP2  
325 duplication mice recapitulates the phenotype occurring in human idiopathic autism. (*Robertson*  
326 *et al., 2013; Spiegel et al., 2019*). The magnitude of this reduction correlates with the expression  
327 of other autistic core traits, such as the severity of social communication deficits and ADOS score  
328 (*Spiegel et al., 2019*). Furthermore, in autistic subjects, slower binocular rivalry shares a common

329 anatomical substrate with general cognitive rigidity — a part of the core repetitive restricted be-  
330 haviors and interests (*Watanabe et al., 2019*).

### 331 **Atypical perception of visual motion in MECP2 duplication syndrome**

332 Enhanced attention to visual detail and superior processing of local visual information are core  
333 traits of autism. Specifically, in autism, the visual perception is superior when the task is based  
334 on detecting local elements in the visual scene while the performance suffers when the subjects  
335 must focus on global elements (*Jolliffe and Baron-Cohen, 1997; Mottron et al., 1999; Happé et al.,*  
336 *2001; Plaisted et al., 1998, 1999; Robertson and Baron-Cohen, 2017; Shah and Frith, 1983; Rinehart*  
337 *et al., 2000; Jarrold et al., 2005*). This perceptual phenotype is usually described in literature as “not  
338 seeing the forest behind the trees” (*Robertson et al., 2012; Frith, 2003*). Of particular relevance to  
339 our study are autism-related changes in the processing of visual motion and integration of local  
340 moving cues into a global moving percept (*Bertone et al., 2003; Brieber et al., 2010; Kaiser and*  
341 *Shiffrar, 2009; Koldewyn et al., 2010; Pellicano et al., 2005; Robertson et al., 2012, 2014; Van der*  
342 *Hallen et al., 2019*). The bi-stable-perception paradigm in our study makes use of two competing  
343 interpretations of a moving plaid: 1. the “transparent” interpretation where component gratings  
344 are seen as separate stimuli moving on top of each other, and 2. the “coherent” interpretation,  
345 where the stimulus is seen as a fusion of two moving component gratings resulting in a percept of  
346 moving pattern (*Adelson and Movshon, 1982; Castelo-Branco et al., 2000; Smith et al., 2005*). It is  
347 proposed that processing of complex stimuli like moving plaid rests on two distinct populations of  
348 neurons: orientation- and direction-selective component neurons and direction-of-motion selec-  
349 tive pattern cells. While the first specialize on local motion information processing and responding  
350 to individual moving grating components, the latter ignore the orientation of the grating compo-  
351 nents, and instead respond to any stimulus moving in the preferred direction, including large-sized  
352 moving patterns such as naturalistic moving visual scenes. Pattern motion selectivity is posited to  
353 arise by integrating the inputs from component-motion-sensitive neurons. As one moves from  
354 primary visual areas to more specialized areas of the visual dorsal stream, the fraction of pattern  
355 cells and neurons integrating various types of local sensory information and computing global mo-  
356 tion increases (*Albright and Stoner, 1995; Gizzi et al., 1990; Juavinett and Callaway, 2015; Khawaja*  
357 *et al., 2009; Movshon and Newsome, 1996; Palagina et al., 2017; Rust et al., 2006; Smith et al., 2005;*  
358 *Scannell et al., 1996; Rodman and Albright, 1989*). Pattern-motion processing in lower-order visual  
359 areas like V1 is strongly dependent on feedback from higher-order areas (*Guo et al., 2004*), while  
360 the integration of local motion cues into the global moving scenes by higher-order areas depends  
361 on the feedforward inputs from the V1 (*Movshon et al., 1985*).

362 Therefore, our competing interpretations are based on categorically different subtypes of visual  
363 motion: 1. local motion (when two individual component gratings are seen) and 2. global motion,  
364 occurring via integration of local motion cues and subsequent fusion of two gratings into a global  
365 moving pattern (as occurs in coherent moving plaid interpretation). Moreover, these two processes  
366 (global vs. local motion) are linked by feedforward and feedback connections across the cortical  
367 hierarchy.

368 In MECP2 duplication mice, we observed a pronounced preference for local motion percepts,  
369 both in terms of the fraction of eye movements aligned with component gratings and in terms  
370 of the duration of transparent versus coherent percepts (Figure 3). This recapitulates the visual  
371 motion processing peculiarities found in a subset of human subjects with autism (*Robertson and*  
372 *Baron-Cohen, 2017; Van der Hallen et al., 2019*). Namely, studies using random dot kinematogram  
373 (RDK) display a subset of subjects with autism show increased motion coherence thresholds (e.g.,  
374 a larger fraction of dots have to move together in the specified direction for the subject to detect  
375 coherent motion). However, this difference diminishes and disappears when the decision win-  
376 dows is extended, implying that integration of local moving cues into a global moving percept is  
377 slowed down, but not fundamentally impaired or absent in autism spectrum (*Robertson et al.,*  
378 *2014*). Another group of studies found no differences in the behavioral performance of subjects

379 when viewing RDK displays; however, subjects with autism still showed differential activation of  
380 visual areas in the dorsal stream, such as V1 and hMT, while observing and reporting coherent mo-  
381 tion (*Brieber et al., 2010; Van der Hallen et al., 2019*). In a similar vein, our MECP2 duplication mice  
382 still consistently experience global moving pattern percepts. However, their durations show incon-  
383 sistent changes: longer in one subgroup of MECP2 duplication animals and shorter in the others.  
384 While the duration of transparent percepts relying on local motion processing is consistently and  
385 dramatically increased compared to normal littermates (Figure 3).

### 386 **Interaction between the atypical perception of visual motion and reduced rate of** 387 **perceptual reversals**

388 In our paradigm, the MECP2 duplication mice show prolonged dominance periods of local motion  
389 perception. In contrast, the global motion percepts are generally shortened or unchanged, leading  
390 to shifted motion processing ratio favoring the local motion information over integrated motion  
391 information (Figure 3). Additionally, the total fraction of OKN eye movements aligned with compo-  
392 nent motion is greatly increased in MECP2 duplication, while the OKN fraction aligned with pattern  
393 motion is reduced (Figure 3). These observations imply that the capacity of neuronal populations  
394 reserved for the global motion percept formation and/or maintenance is reduced in MECP2 dupli-  
395 cation syndrome, or the dynamics of such integration are altered. This is in line with two theories  
396 of autism — dorsal stream deficit theory (*Braddick et al., 2003; Greenaway et al., 2013; Macintyre-*  
397 *Beon et al., 2010; Chieffi, 2019*) and weak central coherence theory (*Dakin and Frith, 2005; Happé*  
398 *et al., 2001; Happé and Frith, 2006*). Dorsal stream deficit theory states that circuitry allocated to  
399 computing global motion from local moving cues is deficient in autism. In children with autism,  
400 this is exemplified by difficulties in following multiple moving objects simultaneously, impaired im-  
401 mitation of visual learning tasks, and performing complex movements without somatosensory feed-  
402 back, since visual guidance of the motor output is disrupted (*Macintyre-Beon et al., 2010; Williams*  
403 *et al., 2004*). Weak central coherence, on the other hand, proposes that global motion perception  
404 deficit may be due to a general cognitive style that prioritizes fine local details over global features  
405 (*Happé and Frith, 2006*). In both types of explanation, the preference of MECP2 duplication mice for  
406 local features at the expense of globally coherent motion may be a major contributor to diminished  
407 rate of visual rivalry. The bias for one specific rivaling interpretation of the stimulus may impair the  
408 ability of the brain to select an alternative interpretation and thus affect the rate of visual rivalry.  
409 In MECP2 duplication, the coherent motion percepts appear to either not amass enough neuronal  
410 population activity or synchrony to remain stable, while local-motion percepts gain stability (Fig-  
411 ure 3). Interestingly, the physiological basis for these changes may occur as early as primary visual  
412 cortical area V1 (*Ash et al., 2022; Palagina et al., 2017; Robertson et al., 2014*). First, pyramidal neu-  
413 rons in area V1 of MECP2 duplication mice show overly reliable firing in response to local motion  
414 information (for example, when moving gratings are used as a stimulus (*Ash et al., 2022*)). Second,  
415 area V1 harbors a significant portion of visual neurons dedicated to the processing of local motion  
416 and, in mice, contributes to the dynamics of bistable perception: removing V1 via lesion causes  
417 a decrease in the fraction of component motion-aligned OKN corresponding to local motion per-  
418 cepts (*Palagina et al., 2017*). In idiopathic human autism, hyperactivation of area V1 was found in  
419 a subset of subjects during the processing of coherent motion (*Brieber et al., 2010*). Additionally,  
420 in another subset of subjects with autism the areas of the dorsal stream, including V1 and mid-  
421 dle temporal area, showed delayed activity during motion coherence processing (*Robertson et al.,*  
422 *2014*). Finally, neuronal responses of MECP2 duplication mice in area V1 show reduced coupling to  
423 ongoing cortical activity (*Ash et al., 2022*). This may result in disruption of both feedforward inputs  
424 from V1 to higher-order areas and weakening of the feedback from these higher-order areas to  
425 V1, reducing the integration of local motion cues there (*Ash et al., 2022*). Taken together, these  
426 observations point to an interesting possibility that the over-representation of local component  
427 motion in area V1 and disrupted connections between V1 and the rest of the visual dorsal stream  
428 are major contributors to the reduced rate of visual rivalry in autism. The reason is that they confer



429 an advantage to the local motion information in the moving stimuli. In contrast, the synthesis of  
430 local information into the global motion of the scenes becomes impaired.

### 431 **Rate of visual rivalry, global motion synthesis and excitatory-inhibitory balance in** 432 **cortical circuits**

433 One of the prominent theories in autism states that core traits of the condition occur secondary to  
434 altered development of cortical interneurons and resulting shift in the balance between excitation  
435 and inhibition in cortical circuits across sensory and higher-order cortical areas (*Casanova et al.,*  
436 *2003; Gogolla et al., 2009; Rubenstein and Merzenich, 2003; Robertson et al., 2014, 2016*). Dynam-  
437 ics of visual rivalry and the rate of perceptual reversals are similarly hypothesized to depend on  
438 excitation-inhibition circuit wiring in the competing clusters of neurons coding for rivalrous per-  
439 cepts (*Laing and Chow, 2002; Seely and Chow, 2011; Klink et al., 2008a*). Computational models  
440 of binocular rivalry show that shifting excitatory-inhibitory ratio causes an increase in dominance  
441 durations, as eye-specific inputs maintain stable activity for more extended periods (*Dayan, 1998;*  
442 *Wilson, 2003; Klink et al., 2010, 2008b; van Loon et al., 2013*). Altered local opponent inhibition in  
443 visuomotor areas was proposed to underlie the delayed integration of local moving features into  
444 global motion percepts in autism (*Robertson et al., 2014*). MECP2 dysfunction was shown to alter  
445 synchrony and net excitation-inhibition balance in neuronal circuits, with a greater impact on the  
446 phenotype of GABAergic interneurons. Overexpression of MECP2 was shown to affect predomi-  
447 nantly genes affecting GABAergic signaling (*Cai et al., 2020; Chao et al., 2010*), with the result of  
448 disrupted synchronization within local and brain-wide networks (*Shou et al., 2017*). Thus, our find-  
449 ings that visual rivalry dynamics are slowed in MECP2 duplication mice and that they favor local  
450 motion percepts over global motion percepts are consistent with the altered excitation-inhibition  
451 dynamics theory of the autistic brain.

452 In summary, our MECP2 duplication mice phenotype reproduces core features of the autism  
453 spectrum — atypical perception of visual motion and slower dynamics of visual rivalry and thus  
454 can serve as a valid model of neural circuit dysfunction. Going forward, our bi-stable perception  
455 paradigm combined with 2-photon imaging and optogenetic manipulations (*Nikolenko et al., 2013;*  
456 *Sofroniew et al., 2016; Yizhar et al., 2011*) in the MECP2 duplication mouse model can be used  
457 to directly and causally test the following theories of the autism: excitatory-inhibitory imbalance,  
458 weak central coherence, dorsal stream deficiency and disrupted intracolumnar and cortex-wide  
459 connectivity.

### 460 **Acknowledgements**

461 It is our pleasure to acknowledge Dr. Dmytro Bogatov for the valuable contributions to the compu-  
462 tational part of this work. We are also grateful for Dr. Katerina Kalemaki, Dr. Andriani Rina, Lukas  
463 Braun, Dr. Joseph Lombardo, Dr. Mingyu Ye and Dr. Stefanos Chatzidakis and Dr. George Keliris for  
464 their advice and everyday support. This work was supported by NIH (Grant No: 1R21EY031537-01  
465 and NS113890 - RO1).

### 466 **References**

- 467 **Adelson EH, Movshon JA.** Phenomenal coherence of moving visual patterns. *Nature.* 1982 12; 300(5892):523-  
468 525. doi: 10.1038/300523a0.
- 469 **Aggelopoulos NC.** Perceptual inference. *Neuroscience & Biobehavioral Reviews.* 2015 5; 55:375-392. doi:  
470 [10.1016/j.neubiorev.2015.05.001](https://doi.org/10.1016/j.neubiorev.2015.05.001).
- 471 **Albright TD, Stoner GR.** Visual motion perception. *Proceedings of the National Academy of Sciences.* 1995;  
472 92(7):2433-2440. doi: [10.1073/pnas.92.7.2433](https://doi.org/10.1073/pnas.92.7.2433).
- 473 **APA.** Diagnostic and Statistical Manual of mental disorders. 5 ed. American Psychiatric Publishing; 2013.

- 474 **Ash RT**, Palagina G, Fernandez-Leon JA, Park J, Seilheimer R, Lee S, Sabharwal J, Reyes F, Wang J, Lu D, Sarfraz  
475 M, Froudarakis E, Tolias AS, Wu SM, Smirnakis SM. Increased Reliability of Visually-Evoked Activity in Area V1  
476 of the MECP2 duplication Mouse Model of Autism. *Journal of Neuroscience*. 2022; 42(33):6469–6482. doi:  
477 [10.1523/JNEUROSCI.0654-22.2022](https://doi.org/10.1523/JNEUROSCI.0654-22.2022).
- 478 **Ash RT**, Buffington SA, Park J, Costa-Mattioli M, Zoghbi HY, Smirnakis SM. Excessive ERK-dependent synaptic  
479 clustering drives enhanced motor learning in the MECP2 duplication syndrome mouse model of autism.  
480 *bioRxiv*. 2017; doi: 10.1101/100875.
- 481 **Ash RT**, Buffington SA, Park J, Suter B, Costa-Mattioli M, Zoghbi HY, Smirnakis SM. Inhibition of Elevated Ras-  
482 MAPK Signaling Normalizes Enhanced Motor Learning and Excessive Clustered Dendritic Spine Stabilization  
483 in the MECP2 duplication Syndrome Mouse Model of Autism. *eNeuro*. 2021; 8(4).
- 484 **Ash RT**, Park J, Suter B, Zoghbi HY, Smirnakis SM. Excessive Formation and Stabilization of Dendritic  
485 Spine Clusters in the MECP2 duplication Syndrome Mouse Model of Autism. *eNeuro*. 2021; 8(1). doi:  
486 [10.1523/ENEURO.0282-20.2020](https://doi.org/10.1523/ENEURO.0282-20.2020).
- 487 **Baron-Cohen S**, Ashwin E, Ashwin C, Tavassoli T, Chakrabarti B. Talent in autism: hyper-systemizing, hyper-  
488 attention to detail and sensory hypersensitivity. *Philosophical Transactions of the Royal Society*. 2009 5;  
489 364(1522):1377–1383.
- 490 **Bertone A**, Mottron L, Jelenic P, Faubert J. Motion perception in autism: a “complex” issue. *Journal of Cognitive*  
491 *Neuroscience*. 2003 2; 15(2):218–225.
- 492 **Bogatova D**, Bogatov D, Palagina G, Dolia. Semi-automated time-series data processing Python 3 Software;  
493 2023. <https://github.com/mecp2-project/Dolia>.
- 494 **Bolton TAW**, Morgenroth E, Preti MG, Van De Ville D. Tapping into Multi-Faceted Human Behavior and Psy-  
495 chopathology Using fMRI Brain Dynamics. *Trends in Neurosciences*. 2020 7; 43(9):667–680.
- 496 **Braddick O**, Atkinson J, Wattam-Bell J. Normal and anomalous development of visual motion processing: mo-  
497 tion coherence and ‘dorsal-stream vulnerability’. *Neuropsychologia*. 2003; 41(13):1769–1784.
- 498 **Brainard DH**. The Psychophysics Toolbox. *Spatial vision*. 1997; 10(4):433–436.
- 499 **Brieber S**, Herpertz-Dahlmann B, Fink GR, Kamp-Becker I, Remschmidt H, Konrad K. Coherent motion process-  
500 ing in autism spectrum disorder (ASD): an fMRI study. *Neuropsychologia*. 2010 2; 48(6):1644–1651.
- 501 **Cahill H**, Nathans J. The optokinetic reflex as a tool for quantitative analyses of nervous system function in  
502 mice: application to genetic and drug-induced variation. *PLoS One*. 2008 4; 3(4):e2055.
- 503 **Cai DC**, Wang Z, Bo T, Yan S, Liu Y, Liu Z, Zeljic K, Chen X, Zhan Y, Xu X, Du Y, Wang Y, Cang J, Wang GZ, Zhang J, Sun  
504 Q, Qiu Z, Ge S, Ye Z, Wang Z. MECP2 duplication Causes Aberrant GABA Pathways, Circuits and Behaviors in  
505 Transgenic Monkeys: Neural Mappings to Patients with Autism. *Journal of Neuroscience*. 2020; 40(19):3799–  
506 3814. doi: [10.1523/JNEUROSCI.2727-19.2020](https://doi.org/10.1523/JNEUROSCI.2727-19.2020).
- 507 **Casanova MF**, Buxhoeveden D, Gomez J. Disruption in the inhibitory architecture of the cell minicolumn: im-  
508 plications for autism. *Neuroscientist*. 2003 12; 9(6):496–507.
- 509 **Castelo-Branco M**, Goebel R, Neuenschwander S, Singer W. Neural synchrony correlates with surface segre-  
510 gation rules. *Nature*. 2000 6; 405(6787):685–689.
- 511 **Chao HT**, Chen H, Samaco RC, Xue M, Chahrour M, Yoo J, Neul JL, Gong S, Lu HC, Heintz N, Ekker M, Rubenstein  
512 JLR, Noebels JL, Rosenmund C, Zoghbi HY. Dysfunction in GABA signalling mediates autism-like stereotypies  
513 and Rett syndrome phenotypes. *Nature*. 2010 11; 468(7321):263–269.
- 514 **Chieffo S**. Dysfunction of Magnocellular/Dorsal Processing Stream in Schizophrenia. *Current Psychiatry Re-*  
515 *views*. 2019 01; 15. doi: 10.2174/1573400515666190119163522.
- 516 **Collins AL**, Levenson JM, Vilaythong AP, Richman R, Armstrong DL, Noebels JL, David Sweatt J, Zoghbi HY. Mild  
517 overexpression of MeCP2 causes a progressive neurological disorder in mice. *Human Molecular Genetics*.  
518 2004 09; 13(21):2679–2689.
- 519 **Dakin S**, Frith U. Vagaries of visual perception in autism. *Neuron*. 2005 11; 48(3):497–507.
- 520 **Dayan P**. A hierarchical model of binocular rivalry. *Neural Computation*. 1998 7; 10(5):1119–1135.

- 521 **Enoksson P.** Binocular rivalry and monocular dominance studied with optokinetic nystagmus. *Acta Ophthalmol*  
522 (Copenh). 1963; 41:544–563.
- 523 **Fox R, Todd S, Bettinger LA.** Optokinetic nystagmus as an objective indicator of binocular rivalry. *Vision Re-*  
524 *search*. 1975 7; 15(7):849–853.
- 525 **Frith U.** *Autism: Explaining the Enigma*. 2 ed. Cognitive Development, London, England: Blackwell; 2003.
- 526 **Gao E, DeAngelis GC, Burkhalter A.** Parallel Input Channels to Mouse Primary Visual Cortex. *Journal of Neuro-*  
527 *science*. 2010; 30(17):5912–5926. doi: [10.1523/JNEUROSCI.6456-09.2010](https://doi.org/10.1523/JNEUROSCI.6456-09.2010).
- 528 **Gizzi MS, Katz E, Schumer RA, Movshon JA.** Selectivity for orientation and direction of motion of single neurons  
529 in cat striate and extrastriate visual cortex. *Journal of Neurophysiology*. 1990 6; 63(6):1529–1543.
- 530 **Gogolla N, Leblanc JJ, Quast KB, Südhof TC, Fagiolini M, Hensch TK.** Common circuit defect of excitatory-  
531 inhibitory balance in mouse models of autism. *Journal of Neurodevelopmental Disorders*. 2009 6; 1(2):172–  
532 181.
- 533 **Greenaway R, Davis G, Plaisted-Grant K.** Marked selective impairment in autism on an index of magnocellular  
534 function. *Neuropsychologia*. 2013 3; 51(4):592–600.
- 535 **Grzadzinski R, Huerta M, Lord C.** DSM-5 and autism spectrum disorders (ASDs): an opportunity for identifying  
536 ASD subtypes. *Molecular Autism*. 2013 5; 4(1):12.
- 537 **Guo K, Benson PJ, Blakemore C.** Pattern motion is present in V1 of awake but not anaesthetized monkeys.  
538 *European Journal of Neuroscience*. 2004 2; 19(4):1055–1066.
- 539 **Van der Hallen R, Manning C, Evers K, Wagemans J.** Global motion perception in autism spectrum disorder: A  
540 meta-analysis. *Journal of Autism and Developmental Disorders*. 2019 12; 49(12):4901–4918.
- 541 **Happé F, Briskman J, Frith U.** Exploring the cognitive phenotype of autism: weak “central coherence” in parents  
542 and siblings of children with autism: I. Experimental tests. *Journal of Child Psychology and Psychiatry*. 2001  
543 3; 42(3):299–307.
- 544 **Happé F, Frith U.** The weak coherence account: detail-focused cognitive style in autism spectrum disorders.  
545 *Journal of Autism and Developmental Disorders*. 2006 1; 36(1):5–25.
- 546 **Heeger DJ, Behrmann M, Dinstein I.** Vision as a beachhead. *Biological Psychiatry*. 2017 5; 81(10):832–837.
- 547 **Jarrold C, Gilchrist ID, Bender A.** Embedded figures detection in autism and typical development: prelimi-  
548 nary evidence of a double dissociation in relationships with visual search. *Developmental Science*. 2005 7;  
549 8(4):344–351.
- 550 **Jiang M, Ash RT, Baker SA, Suter B, Ferguson A, Park J, Rudy J, Torsky SP, Chao HT, Zoghbi HY, Smirnakis SM.** Den-  
551 dritic arborization and spine dynamics are abnormal in the mouse model of MECP2 duplication syndrome.  
552 *Journal of Neuroscience*. 2013 12; 33(50):19518–19533.
- 553 **Jolliffe T, Baron-Cohen S.** Are people with autism and Asperger syndrome faster than normal on the Embedded  
554 Figures Test? *Journal of Child Psychology and Psychiatry*. 1997 7; 38(5):527–534.
- 555 **Juavinett AL, Callaway EM.** Pattern and component motion responses in mouse visual cortical areas. *Current*  
556 *Biology*. 2015 6; 25(13):1759–1764.
- 557 **Kaiser MD, Shiffrar M.** The visual perception of motion by observers with autism spectrum disorders: a review  
558 and synthesis. *Psychonomic Bulletin & Review*. 2009 10; 16(5):761–777.
- 559 **Khawaja FA, Tsui JMG, Pack CC.** Pattern motion selectivity of spiking outputs and local field potentials in  
560 macaque visual cortex. *Journal of Neuroscience*. 2009 10; 29(43):13702–13709.
- 561 **Kleinschmidt A, Büchel C, Zeki S, Frackowiak RS.** Human brain activity during spontaneously reversing percep-  
562 tion of ambiguous figures. *Proceedings of the Royal Society*. 1998 12; 265(1413):2427–2433.
- 563 **Klink PC, van Ee R, Nijs MM, Brouwer GJ, Noest AJ, van Wezel RJA.** Early interactions between neuronal adap-  
564 tation and voluntary control determine perceptual choices in bistable vision. *Journal of Vision*. 2008 05;  
565 8(5):16–16. doi: [10.1167/8.5.16](https://doi.org/10.1167/8.5.16).
- 566 **Klink PC, Brascamp JW, Blake R, van Wezel RJA.** Experience-driven plasticity in binocular vision. *Current Biology*.  
567 2010 8; 20(16):1464–1469.

- 568 **Klink PC**, van Ee R, van Wezel RJA. General Validity of Levelt's Propositions Reveals Common Computational  
569 Mechanisms for Visual Rivalry. *PLOS ONE*. 2008 10; 3(10):1–9. doi: [10.1371/journal.pone.0003473](https://doi.org/10.1371/journal.pone.0003473).
- 570 **Knapen T**, Brascamp J, Pearson J, van Ee R, Blake R. The role of frontal and parietal brain areas in bistable  
571 perception. *Journal of Neuroscience*. 2011 7; 31(28):10293–10301.
- 572 **Koldewyn K**, Whitney D, Rivera SM. The psychophysics of visual motion and global form processing in autism.  
573 *Brain*. 2010 2; 133(Pt 2):599–610.
- 574 **Laing CR**, Chow CC. A spiking neuron model for binocular rivalry. *Journal of Computational Neuroscience*. 2002  
575 1; 12(1):39–53.
- 576 **Lawson RA**, Papadakis AA, Higginson CI, Barnett JE, Wills MC, Strang JF, Wallace GL, Kenworthy L. Everyday  
577 executive function impairments predict comorbid psychopathology in autism spectrum and attention deficit  
578 hyperactivity disorders. *Neuropsychology*. 2015 5; 29(3):445–453.
- 579 **Leopold DA**, Logothetis NK. Activity changes in early visual cortex reflect monkeys' percepts during binocular  
580 rivalry. *Nature*. 1996 2; 379(6565):549–553.
- 581 **Leopold DA**, Logothetis NK. Multistable phenomena: changing views in perception. *Trends in Cognitive Sci-*  
582 *ences*. 1999 7; 3(7):254–264.
- 583 **Leopold D**, Fitzgibbons J, Logothetis N. The Role of Attention in Binocular Rivalry as Revealed through Optoki-  
584 netic Nystagmus. Massachusetts Institute Of Technology Cambridge Artificial Intelligence Lab; 1995.
- 585 **Logothetis N**, Schall J. Neural correlates of subjective visual perception. . 1989 09; 245:761–3.
- 586 **van Loon AM**, Knapen T, Scholte HS, St John-Saaltink E, Donner TH, Lamme VAF. GABA shapes the dynamics  
587 of bistable perception. *Current Biology*. 2013 5; 23(9):823–827.
- 588 **Lumer ED**, Friston KJ, Rees G. Neural correlates of perceptual rivalry in the human brain. *Science*. 1998 6;  
589 280(5371):1930–1934.
- 590 **Lumer ED**, Rees G. Covariation of activity in visual and prefrontal cortex associated with subjective visual  
591 perception. *Proceedings of the National Academy of Sciences*. 1999 2; 96(4):1669–1673.
- 592 **Macintyre-Beon C**, Ibrahim H, Hay I, Cockburn D, Calvert J, N Dutton G, Bowman R. Dorsal Stream Dysfunction  
593 in Children. A Review and an Approach to Diagnosis and Management. *Current Pediatric Reviews*. 2010;  
594 6(3):166–182.
- 595 **Mathis A**, Mamidanna P, Cury KM, Abe T, Murthy VN, Mathis MW, Bethge M. DeepLabCut: markerless pose  
596 estimation of user-defined body parts with deep learning. *Nature Neuroscience*. 2018 9; 21(9):1281–1289.
- 597 **Moreno-Bote R**, Shpiro A, Rinzel J, Rubin N. Alternation rate in perceptual bistability is maximal at and sym-  
598 metric around equi-dominance. *Journal of Vision*. 2010 9; 10(11):1.
- 599 **Mottron L**, Burack JA, Stauder JE, Robaey P. Perceptual processing among high-functioning persons with autism.  
600 *Journal of Child Psychology and Psychiatry*. 1999 2; 40(2):203–211.
- 601 **Movshon J**, Adelson E, Gizzi M, Newsome W. In: Chagas C, Gattass R, Gross C, editors. The analysis of moving  
602 visual patterns Pontificiae Academiae Scientiarum Scripta Varia, Vatican Press; 1985. p. 117–151.
- 603 **Movshon JA**, Newsome WT. Visual response properties of striate cortical neurons projecting to area MT in  
604 macaque monkeys. *Journal of Neuroscience*. 1996 12; 16(23):7733–7741.
- 605 **Naber M**, Frässle S, Einhäuser W. Perceptual rivalry: reflexes reveal the gradual nature of visual awareness.  
606 *PLoS One*. 2011 6; 6(6):e20910.
- 607 **Niell CM**, Stryker MP. Highly selective receptive fields in mouse visual cortex. *Journal of Neuroscience*. 2008 7;  
608 28(30):7520–7536.
- 609 **Nikolenko V**, Peterka DS, Araya R, Woodruff A, Yuste R. Spatial light modulator microscopy. *Cold Spring Harbor*  
610 *Protocols*. 2013 12; 2013(12):1132–1141.
- 611 **Ohki K**, Chung S, Ch'ng YH, Kara P, Reid RC. Functional imaging with cellular resolution reveals precise micro-  
612 architecture in visual cortex. *Nature*. 2005 2; 433(7026):597–603.

- 613 **Palagina G**, Meyer JF, Smirnakis SM. Complex visual motion representation in mouse area V1. *Journal of*  
614 *Neuroscience*. 2017 1; 37(1):164–183.
- 615 **Pellicano E**, Gibson L, Maybery M, Durkin K, Badcock DR. Abnormal global processing along the dorsal vi-  
616 *sual pathway in autism: a possible mechanism for weak visuospatial coherence?* *Neuropsychologia*. 2005;  
617 43(7):1044–1053.
- 618 **Peters SU**, Hundley RJ, Wilson AK, Warren Z, Vehorn A, Carvalho CMB, Lupski JR, Ramocki MB. The behavioral  
619 *phenotype in MECP2 duplication syndrome: a comparison with idiopathic autism.* *Autism Research*. 2013 2;  
620 6(1):42–50.
- 621 **Plaisted K**, O’Riordan M, Baron-Cohen S. Enhanced discrimination of novel, highly similar stimuli by adults with  
622 *autism during a perceptual learning task.* *Journal of Child Psychology and Psychiatry*. 1998 7; 39(5):765–775.
- 623 **Plaisted K**, Swettenham J, Rees L. Children with autism show local precedence in a divided attention task and  
624 *global precedence in a selective attention task.* *Journal of Child Psychology and Psychiatry*. 1999 7; 40(5):733–  
625 742.
- 626 **Ramocki MB**, Tavyev YJ, Peters SU. The MECP2 duplication syndrome. *American Journal of Medical Genetics -*  
627 *Part A*. 2010 5; 152A(5):1079–1088.
- 628 **Rinehart NJ**, Bradshaw JL, Moss SA, Brereton AV, Tonge BJ. Atypical interference of local detail on global pro-  
629 *cessing in high-functioning autism and Asperger’s disorder.* *J Child Psychol Psychiatry*. 2000 Sep; 41(6):769–  
630 778.
- 631 **Robertson AE**, Simmons DR. The sensory experiences of adults with autism spectrum disorder: A qualitative  
632 *analysis.* *Perception*. 2015; 44(5):569–586.
- 633 **Robertson CE**, Baron-Cohen S. Sensory perception in autism. *Nature Reviews Neuroscience*. 2017 11;  
634 18(11):671–684.
- 635 **Robertson CE**, Kravitz DJ, Freyberg J, Baron-Cohen S, Baker CI. Slower rate of binocular rivalry in autism. *Journal*  
636 *of Neuroscience*. 2013 10; 33(43):16983–16991.
- 637 **Robertson CE**, Martin A, Baker CI, Baron-Cohen S. Atypical integration of motion signals in Autism Spectrum  
638 *Conditions.* *PLoS One*. 2012 11; 7(11):e48173.
- 639 **Robertson CE**, Ratai EM, Kanwisher N. Reduced GABAergic action in the autistic brain. *Current Biology*. 2016  
640 1; 26(1):80–85.
- 641 **Robertson CE**, Thomas C, Kravitz DJ, Wallace GL, Baron-Cohen S, Martin A, Baker CI. Global motion perception  
642 *deficits in autism are reflected as early as primary visual cortex.* *Brain*. 2014 9; 137(Pt 9):2588–2599.
- 643 **Rodman HR**, Albright TD. Single-unit analysis of pattern-motion selective properties in the middle temporal  
644 *visual area (MT).* *Exp Brain Res*. 1989; 75(1):53–64.
- 645 **Rubenstein JLR**, Merzenich MM. Model of autism: increased ratio of excitation/inhibition in key neural systems.  
646 *Genes, Brain and Behavior*. 2003 10; 2(5):255–267.
- 647 **Rust NC**, Mante V, Simoncelli EP, Movshon JA. How MT cells analyze the motion of visual patterns. *Nature*  
648 *Neuroscience*. 2006 11; 9(11):1421–1431.
- 649 **Samaco RC**, Mandel-Brehm C, McGraw CM, Shaw CA, McGill BE, Zoghbi HY. Crh and Oprm1 mediate anxiety-  
650 *related behavior and social approach in a mouse model of MECP2 duplication syndrome.* *Nature Genetics*.  
651 2012 1; 44(2):206–211.
- 652 **Scannell JW**, Sengpiel F, Tovée MJ, Benson PJ, Blakemore C, Young MP. Visual motion processing in the anterior  
653 *ectosylvian sulcus of the cat.* *Journal of Neurophysiology*. 1996 8; 76(2):895–907.
- 654 **Schmack K**, Schnack A, Priller J, Sterzer P. Perceptual instability in schizophrenia: Probing predictive coding  
655 *accounts of delusions with ambiguous stimuli.* *Schizophrenia Research: Cognition*. 2015 6; 2(2):72–77.
- 656 **Seely J**, Chow CC. Role of mutual inhibition in binocular rivalry. *Journal of Neurophysiology*. 2011 11;  
657 106(5):2136–2150.
- 658 **Shafritz KM**, Dichter GS, Baranek GT, Belger A. The neural circuitry mediating shifts in behavioral response  
659 *and cognitive set in autism.* *Biological Psychiatry*. 2008 5; 63(10):974–980.



- 660 **Shah A**, Frith U. An islet of ability in autistic children: a research note. *Journal of Child Psychology and Psychiatry*.  
661 1983 10; 24(4):613–620.
- 662 **Shou G**, Mosconi MW, Wang J, Ethridge LE, Sweeney JA, Ding L. Electrophysiological signatures of atypical  
663 intrinsic brain connectivity networks in autism. *Journal of Neural Engineering*. 2017 8; 14(4):046010.
- 664 **Simmons DR**, Robertson AE, McKay LS, Toal E, McAleer P, Pollick FE. Vision in autism spectrum disorders. *Vision*  
665 *Research*. 2009 11; 49(22):2705–2739.
- 666 **Smith MA**, Majaj NJ, Movshon JA. Dynamics of motion signaling by neurons in macaque area MT. *Nature*  
667 *Neuroscience*. 2005 2; 8(2):220–228.
- 668 **Sofroniew NJ**, Flickinger D, King J, Svoboda K. A large field of view two-photon mesoscope with subcellular  
669 resolution for in vivo imaging. *Elife*. 2016 6; 5.
- 670 **Spiegel A**, Mentch J, Haskins AJ, Robertson CE. Slower binocular rivalry in the autistic brain. *Current Biology*.  
671 2019 9; 29(17):2948–2953.e3.
- 672 **Sterzer P**, Kleinschmidt A, Rees G. The neural bases of multistable perception. *Trends in Cognitive Sciences*.  
673 2009 7; 13(7):310–318.
- 674 **Sztainberg Y**, Chen HM, Swann JW, Hao S, Tang B, Wu Z, Tang J, Wan YW, Liu Z, Rigo F, Zoghbi HY. Reversal of  
675 phenotypes in MECP2 duplication mice using genetic rescue or antisense oligonucleotides. *Nature*. 2015 12;  
676 528(7580):123–126.
- 677 **Ta D**, Downs J, Baynam G, Wilson A, Richmond P, Leonard H. A brief history of MECP2 duplication syndrome:  
678 20-years of clinical understanding. *Orphanet Journal of Rare Diseases*. 2022 3; 17(1):131.
- 679 **Uddin LQ**. Brain mechanisms supporting flexible cognition and behavior in adolescents with autism spectrum  
680 disorder. *Biological Psychiatry*. 2021 1; 89(2):172–183.
- 681 **de Vries SEJ**, Lecoq JA, Buice MA, Groblewski PA, Ocker GK, Oliver M, Feng D, Cain N, Ledochowitsch P, Millman  
682 D, Roll K, Garrett M, Keenan T, Kuan L, Mihalas S, Olsen S, Thompson C, Wakeman W, Waters J, Williams D,  
683 et al. A large-scale standardized physiological survey reveals functional organization of the mouse visual  
684 cortex. *Nature Neuroscience*. 2019 12; 23(1):138–151.
- 685 **Watanabe K**. Optokinetic nystagmus with spontaneous reversal of transparent motion perception. *Experi-*  
686 *mental Brain Research*. 1999 11; 129(1):156–160.
- 687 **Watanabe T**, Lawson RP, Walldén YSE, Rees G. A neuroanatomical substrate linking perceptual stability to  
688 cognitive rigidity in autism. *Journal of Neuroscience*. 2019 8; 39(33):6540–6554.
- 689 **Wei M**, Sun F. The alternation of optokinetic responses driven by moving stimuli in humans. *Brain Research*.  
690 1998 12; 813(2):406–410.
- 691 **Williams JHG**, Whiten A, Singh T. A systematic review of action imitation in autistic spectrum disorder. *Journal*  
692 *of Autism and Developmental Disorders*. 2004 6; 34(3):285–299.
- 693 **Wilson HR**. Computational evidence for a rivalry hierarchy in vision. *Proceedings of the National Academy of*  
694 *Sciences*. 2003 11; 100(24):14499–14503.
- 695 **Yizhar O**, Fenno LE, Prigge M, Schneider F, Davidson TJ, O’Shea DJ, Sohal VS, Goshen I, Finkelstein J, Paz  
696 JT, Stehfest K, Fudim R, Ramakrishnan C, Huguenard JR, Hegemann P, Deisseroth K. Neocortical excita-  
697 tion/inhibition balance in information processing and social dysfunction. *Nature*. 2011 7; 477(7363):171–178.
- 698 **Yo C**, Demer JL. Two-dimensional optokinetic nystagmus induced by moving plaids and texture boundaries.  
699 Evidence for multiple visual pathways. *Invest Ophthalmol Vis Sci*. 1992 Jul; 33(8):2490–2500.
- 700 **Zhang D**, Yu B, Liu J, Jiang W, Xie T, Zhang R, Tong D, Qiu Z, Yao H. Altered visual cortical processing in a mouse  
701 model of MECP2 duplication syndrome. *Scientific Reports*. 2017 7; 7(1):6468.
- 702 **Zhao H**, Mao X, Zhu C, Zou X, Peng F, Yang W, Li B, Li G, Ge T, Cui R. GABAergic system dysfunction in autism  
703 spectrum disorders. *Frontiers in Cell and Developmental Biology*. 2021; 9:781327.
- 704 **Zhou C**, Yan S, Qian S, Wang Z, Shi Z, Xiong Y, Zhou Y. Atypical response properties of the auditory cortex of  
705 awake MECP2-overexpressing mice. *Frontiers in Neuroscience*. 2019 5; 13:439.
